# Supplementary material for: Special emergency situations and hazard control in German hospitals—A survey on the current state
Source: Anaesthesiologie. 2023 Oct 19;72(11):784–90. [Article in German] doi: 10.1007/s00101-023-01349-2 (PMC10615912; doi:10.1007/s00101-023-01349-2)
Supplement: Supplementary file 1 [file 101_2023_1349_MOESM1_ESM.pdf]

# Fragebogen

## 1 Startseite

---

Sehr geehrte Teilnehmerin, sehr geehrter Teilnehmer,

wir führen eine anonyme Umfrage zum Thema „**Maßnahmen für die Sicherheit in Krankenhäusern**“ durch. Hierfür würden wir Ihnen gerne einige Fragen zu den technischen, organisatorischen und personellen Maßnahmen in Ihrem Krankenhaus stellen, die zur Risikominimierung und Gefahrenabwehr eingesetzt werden. Die Beantwortung wird ca. 15 Minuten Zeit in Anspruch nehmen.

Wir erfassen dabei **keine** personenbezogenen Daten, Ihre Teilnahme ist **komplett anonym**. Die Teilnahme an der Studie erfolgt freiwillig. Falls Sie teilnehmen möchten, bitten wir Sie, die folgende Umfrage bis zu Ende zu beantworten; **ein Abbruch ist jederzeit möglich**. Inkomplett ausgefüllte Fragebögen werden nicht ausgewertet, erst mit der vollständigen Bearbeitung des Fragebogens erklären Sie Ihre Einwilligung. Die erhobenen Daten werden ausschließlich zu Zwecken dieser Studie verwendet. Die Studienleitung wird alle angemessenen Schritte unternehmen, um den Schutz der Daten gemäß den Datenschutzstandards der Europäischen Union zu gewährleisten. Die Daten sind gegen unbefugten Zugriff gesichert und werden für 5 Jahre aufgehoben. Ihnen entstehen aus der Teilnahme weder persönlicher Nutzen noch Risiken.

Die Umfrage wurde der Ethikkommission der Medizinischen Fakultät der Universität Heidelberg vorgelegt und erhielt ein positives Votum (Aktenzeichen S-468/2022 vom 03.08.2022).

Für Rückfragen erreichen Sie uns jederzeit unter [patientensicherheit.anae@med.uni-heidelberg.de](mailto:patientensicherheit.anae@med.uni-heidelberg.de)

---

## 2 Krankenhausinfo

---

### Welcher Versorgungsstufe gehört Ihr Krankenhaus an?

Bitte wählen Sie eine Option

- ☐ Grund- und Regelversorgung
- ☐ Schwerpunktversorgung
- ☐ Maximalversorgung (nichtuniversitär)
- ☐ Maximalversorgung (universitär)

### Über wieviele Betten verfügt Ihr Krankenhaus?

Bitte geben sie einen ganzen Wert ein

## 3 Kriminaldelikte

### Kriminaldelikte wie z.B. Diebstahl, Raub, Vandalismus/Sachbeschädigung etc. stellen ein Problem dar

Bitte wählen Sie eine Antwortmöglichkeit

- ☐ ja
- ☐ nein

### Folgende Sachwerte waren in unserem Krankenhaus bereits Ziel krimineller Handlungen:

Bitte bewerten Sie alle Kategorien

|                         | Ja                    | Nein                  | Unbekannt             |
|-------------------------|-----------------------|-----------------------|-----------------------|
| Medikamente             | <input type="radio"/> | <input type="radio"/> | <input type="radio"/> |
| Gerätschaften           | <input type="radio"/> | <input type="radio"/> | <input type="radio"/> |
| Gebäude                 | <input type="radio"/> | <input type="radio"/> | <input type="radio"/> |
| Einrichtungsgegenstände | <input type="radio"/> | <input type="radio"/> | <input type="radio"/> |
| Wertsachen              | <input type="radio"/> | <input type="radio"/> | <input type="radio"/> |

### IT-Sicherheit von Patienten- oder Forschungsdaten stellt ein relevantes Problem dar

Bitte wählen Sie eine Antwortmöglichkeit

- ☐ ja
- ☐ nein

## Unser Krankenhaus war bereits Ziel folgender krimineller Handlungen im IT-Bereich:

Bitte bewerten Sie alle Kategorien

|                             | Ja                    | Nein                  | Unbekannt             |
|-----------------------------|-----------------------|-----------------------|-----------------------|
| Hackerangriff/Cyberattacken | <input type="radio"/> | <input type="radio"/> | <input type="radio"/> |
| Raub von Patientendaten     | <input type="radio"/> | <input type="radio"/> | <input type="radio"/> |
| Raub von Forschungsdaten    | <input type="radio"/> | <input type="radio"/> | <input type="radio"/> |

## 4 Technische Ausstattung

### Das Krankenhaus verfügt über:

Bitte bewerten Sie die folgenden Aussagen

|                             | ja                    | nein                  | unbekannt             |
|-----------------------------|-----------------------|-----------------------|-----------------------|
| <b>Bereich Feuerschutz</b>  |                       |                       |                       |
| Brandmeldeanlage            | <input type="radio"/> | <input type="radio"/> | <input type="radio"/> |
| Rauch- und Feuerschutztüren | <input type="radio"/> | <input type="radio"/> | <input type="radio"/> |
| Rauchabzugsanlagen          | <input type="radio"/> | <input type="radio"/> | <input type="radio"/> |

### Notfallalarmierung- und lenkung

|                                                                                                                                                                                         |                       |                       |                       |
|-----------------------------------------------------------------------------------------------------------------------------------------------------------------------------------------|-----------------------|-----------------------|-----------------------|
| Fluchtwegsicherungssysteme (sichern gegen unkontrollierten Ein- bzw. Austritt von Personen, und sorgen dafür, dass Rettungswege Türen im Gefahrfall freigeschaltet und geöffnet werden) | <input type="radio"/> | <input type="radio"/> | <input type="radio"/> |
| Notbeleuchtung                                                                                                                                                                          | <input type="radio"/> | <input type="radio"/> | <input type="radio"/> |
| Sprachalarmanlage (Beschallungsanlage, die aufgrund ihres besonderen Aufbaus und ihrer hohen Sprachverständlichkeit für Alarmierungs- und Evakuierungsaufgaben geeignet ist)            | <input type="radio"/> | <input type="radio"/> | <input type="radio"/> |
| Einbruchmeldeanlagen (Alarmanlage z.B. mit Glasbruch-/Bewegungssensoren)                                                                                                                | <input type="radio"/> | <input type="radio"/> | <input type="radio"/> |
| Notfall- und Gefahrenreaktions-System (NRGS, "Hausalarm" zur Alarmierung von z.B. Sicherheitsdienst oder Polizei)                                                                       | <input type="radio"/> | <input type="radio"/> | <input type="radio"/> |

### Sonstiges

|                 |                       |                       |                       |
|-----------------|-----------------------|-----------------------|-----------------------|
| Rohrpostanlagen | <input type="radio"/> | <input type="radio"/> | <input type="radio"/> |
|-----------------|-----------------------|-----------------------|-----------------------|

**Das Krankenhaus nutzt Videoüberwachung:**

Bitte bewerten Sie die folgenden Aussagen

|                                                                                                                             | ja                    | nein                  | unbekannt             |
|-----------------------------------------------------------------------------------------------------------------------------|-----------------------|-----------------------|-----------------------|
| Im öffentlichen Bereich (z.B. Eingänge, Anmeldung, Ambulanzen, Wartebereiche, Kantine)                                      | <input type="radio"/> | <input type="radio"/> | <input type="radio"/> |
| Im nichtöffentlichen Bereich (z.B. Patientenzimmer, Behandlungsräume, Funktions-/ Lager- /Technikräume, Labor- /OP-Bereich) | <input type="radio"/> | <input type="radio"/> | <input type="radio"/> |
| Zur Überwachung der Freigelände (Videoüberwachung der Aussenanlage, Parkplätze etc)                                         | <input type="radio"/> | <input type="radio"/> | <input type="radio"/> |

**Das Krankenhaus nutzt folgende Möglichkeiten der Zugangssteuerung:**

Bitte bewerten Sie die folgenden Aussagen

|                                                    | ja                    | nein                  | unbekannt             |
|----------------------------------------------------|-----------------------|-----------------------|-----------------------|
| Mechanisch (Schlüssel)                             | <input type="radio"/> | <input type="radio"/> | <input type="radio"/> |
| Elektronisch (Chipkarte/Mitarbeiterausweis/Dongle) | <input type="radio"/> | <input type="radio"/> | <input type="radio"/> |
| Biometrisch (Fingerabdruck)                        | <input type="radio"/> | <input type="radio"/> | <input type="radio"/> |

**Es wird IT/EDV-Infrastruktur als Backup vorgehalten, die nicht im Routinebetrieb eingesetzt wird**

Bitte wählen Sie eine Antwortmöglichkeit

- ☐ ja
- ☐ nein
- ☐ unbekannt

**Es wird Kommunikationstechnik als Backup vorgehalten, die nicht im Routinebetrieb eingesetzt wird (Einsatzstellenfunk)**

Bitte wählen Sie eine Antwortmöglichkeit

- ☐ ja
- ☐ nein
- ☐ unbekannt

**5 Organisatorische Maßnahmen**

**Das Krankenhaus verfügt über:**

---

Bitte bewerten Sie die Antwortmöglichkeiten

|                                                                    | Ja                    | Nein                  | Unbekannt             |
|--------------------------------------------------------------------|-----------------------|-----------------------|-----------------------|
| Krankenhausalarm- und Einsatzplan (KAEP)                           | <input type="radio"/> | <input type="radio"/> | <input type="radio"/> |
| Klinikeinsatzleitung (KEL) mit Stabsstruktur                       | <input type="radio"/> | <input type="radio"/> | <input type="radio"/> |
| Ereignisspezifische Einsatzpläne/Verfahrensanweisungen/Checklisten | <input type="radio"/> | <input type="radio"/> | <input type="radio"/> |
| Hausordnung                                                        | <input type="radio"/> | <input type="radio"/> | <input type="radio"/> |

## Das Krankenhaus verfügt über ereignisspezifische Pläne zu den folgenden Schadenslagen (gemäß Empfehlung des BBK):

Bitte bewerten Sie die Antwortmöglichkeiten

|                                                  | Ja                    | Nein                  | Unbekannt             |
|--------------------------------------------------|-----------------------|-----------------------|-----------------------|
| Evakuierung/Räumung des Krankenhauses            | <input type="radio"/> | <input type="radio"/> | <input type="radio"/> |
| Brand im Krankenhaus                             | <input type="radio"/> | <input type="radio"/> | <input type="radio"/> |
| Massenanfall von Verletzten (MANV)               | <input type="radio"/> | <input type="radio"/> | <input type="radio"/> |
| <b>CBRN</b>                                      |                       |                       |                       |
| Biologische Gefahrenlage                         | <input type="radio"/> | <input type="radio"/> | <input type="radio"/> |
| Chemische Gefahrenlage                           | <input type="radio"/> | <input type="radio"/> | <input type="radio"/> |
| Radio-nukleare Gefahrenlage                      | <input type="radio"/> | <input type="radio"/> | <input type="radio"/> |
| <b>Polizeiliche Lagen</b>                        |                       |                       |                       |
| Amoklauf/Terroranschlag                          | <input type="radio"/> | <input type="radio"/> | <input type="radio"/> |
| Bombendrohung                                    | <input type="radio"/> | <input type="radio"/> | <input type="radio"/> |
| Geiselnahme                                      | <input type="radio"/> | <input type="radio"/> | <input type="radio"/> |
| <b>Naturgefahren</b>                             |                       |                       |                       |
| Hochwasser                                       | <input type="radio"/> | <input type="radio"/> | <input type="radio"/> |
| Starkregen                                       | <input type="radio"/> | <input type="radio"/> | <input type="radio"/> |
| <b>Störung kritischer Infrastruktur (KRITIS)</b> |                       |                       |                       |
| Ausfall der IT                                   | <input type="radio"/> | <input type="radio"/> | <input type="radio"/> |
| Ausfall der elektrischen Energieversorgung       | <input type="radio"/> | <input type="radio"/> | <input type="radio"/> |
| Ausfall der Wasserversorgung                     | <input type="radio"/> | <input type="radio"/> | <input type="radio"/> |
| Ausfall der Wärmeversorgung                      | <input type="radio"/> | <input type="radio"/> | <input type="radio"/> |
| Ausfall der Kommunikation                        | <input type="radio"/> | <input type="radio"/> | <input type="radio"/> |

## 6 Personelle Maßnahmen

---

**Es existiert eine ärztlich besetzte Stabsstelle Krisen-/Katastrophenmanagement**

---

Bitte wählen Sie eine Antwortmöglichkeit

☐ ja (MIT Freistellung)☐ ja (OHNE Freistellung)☐ nein☐ unbekannt

---

**Im Krankenhaus kommt ein Sicherheitsdienst zum Einsatz**

---

Bitte bewerten Sie die Aussage

☐ ja☐ nein☐ unbekannt

---

**7 Personelle Maßnahmen 2**

---

---

**Der Sicherheitsdienst wird gestellt von:**

---

Bitte wählen Sie eine Antwortoption

☐ Klinikeigene Mitarbeiter☐ Externe Sicherheitsfirma☐ Beides

---

**Haben Sie sonstige Kommentare zum Thema Sicherheit in Krankenhäusern?**

---

Bitte geben Sie Anmerkungen/Kommentare hier ein (es dürfen KEINE personenbezogenen Daten eingetragen werden):

---

**8 Endseite**

---

Vielen Dank für Ihre Teilnahme!
